# Supplementary material for: Competence of non-human primates to transmit Leishmania infantum to the invertebrate vector Lutzomyia longipalpis
Source: PubMed Central journal article supplement (PMC6488095; doi:10.1371/journal.pntd.0007313), 2019-04-17
Supplement: pntd.0007313.s001.pdf [file pntd.0007313.s001.pdf]

**S1 Table.** Origins and time span of housing at the zoological garden in Belo Horizonte (Brazil) of non-human primates included in the study.

| <b>Specie</b>                     | <b>Popular Name</b>          | <b>ID</b> | <b>Gender</b> | <b>Age (years)</b> | <b>Origin</b>                                     | <b>Entrance at FPMZ-BH</b> |
|-----------------------------------|------------------------------|-----------|---------------|--------------------|---------------------------------------------------|----------------------------|
| <i>Alouatta caraya</i>            | Black-and Gold Howler Monkey | 01        | Female        | 12                 | Born at FPMZ-BH/ MG, Brazil                       | 2007                       |
|                                   |                              | 02        | Female        | 06                 | Born at FPMZ-BH/ MG, Brazil                       | 2013                       |
|                                   |                              | 03        | Female        | 06                 | Born at FPMZ-BH/ MG, Brazil                       | 2013                       |
|                                   |                              | 04        | Male          | 09                 | Born at FPMZ-BH/ MG, Brazil                       | 2010                       |
| <i>Alouatta guariba</i>           | Brown Howler Monkey          | 05        | Male          | > 16               | Varginha Zoo/ MG, Brazil                          | 2003                       |
|                                   |                              | 06        | Female        | > 18               | Unknow                                            | 2001                       |
| <i>Lagothrix cana</i>             | Peruvian Woolly Monkey       | 07        | Male          | > 03               | CETAS from Porto Velho/ RO, Brazil                | 2016                       |
|                                   |                              | 08        | Female        | > 03               | CETAS from Porto Velho/ RO, Brazil                | 2016                       |
|                                   |                              | 09        | Male          | > 03               | CETAS from Porto Velho/ RO, Brazil                | 2016                       |
|                                   |                              | 10        | Female        | > 03               | CETAS from Porto Velho/ RO, Brazil                | 2016                       |
|                                   |                              | 11        | Female        | > 03               | CETAS from Porto Velho/ RO, Brazil                | 2016                       |
|                                   |                              | 12        | Female        | > 03               | CETAS from Porto Velho/ RO, Brazil                | 2016                       |
|                                   |                              | 13        | Female        | > 03               | CETAS from Porto Velho/ RO, Brazil                | 2016                       |
| <i>Aotus nigriceps</i>            | Black-headed Night Monkey    | 14        | Female        | > 07               | CETAS from Porto Velho/ RO, Brazil                | 2012                       |
|                                   |                              | 15        | Male          | 03                 | Born at FPMZ-BH/ MG, Brazil                       | 2016                       |
| <i>Leontopithecus chrysomelas</i> | Golden-headed Lion Tamarin   | 16        | Female        | > 07               | Primateology Center at Rio de Janeiro/ RJ, Brazil | 2012                       |
| <i>Leontopithecus rosalia</i>     | Golden Lion Tamarin          | 17        | Male          | 06                 | Born at FPMZ-BH/ MG, Brazil                       | 2013                       |
|                                   |                              | 18        | Male          | > 07               | Primateology Center at Rio de Janeiro/ RJ, Brazil | 2012                       |
|                                   |                              | 19        | Male          | 05                 | Born at FPMZ-BH/ MG, Brazil                       | 2014                       |
|                                   |                              | 20        | Male          | 05                 | Born at FPMZ-BH/ MG, Brazil                       | 2014                       |

---

|                                       |                                 |    |        |      |                                                    |      |
|---------------------------------------|---------------------------------|----|--------|------|----------------------------------------------------|------|
|                                       |                                 | 21 | Male   | 03   | Born at FPMZ-BH/<br>MG, Brazil                     | 2016 |
|                                       |                                 | 22 | Female | 04   | Born at FPMZ-BH/<br>MG, Brazil                     | 2015 |
|                                       |                                 | 23 | Male   | > 10 | Americana Zoo/ SP,<br>Brazil                       | 2009 |
|                                       |                                 | 24 | Male   | 03   | Born at FPMZ-BH/<br>MG, Brazil                     | 2016 |
|                                       |                                 | 25 | Female | > 07 | São Carlos Zoo/ SP,<br>Brazil                      | 2012 |
|                                       |                                 | 26 | Male   | 03   | Born at FPMZ-BH/<br>MG, Brazil                     | 2016 |
|                                       |                                 | 27 | Male   | 05   | Born at FPMZ-BH/<br>MG, Brazil                     | 2014 |
|                                       |                                 | 28 | Female | 04   | Born at FPMZ-BH/<br>MG, Brazil                     | 2015 |
|                                       |                                 | 29 | Female | 05   | Born at FPMZ-BH/<br>MG, Brazil                     | 2014 |
|                                       |                                 | 30 | Female | 03   | Born at FPMZ-BH/<br>MG, Brazil                     | 2016 |
|                                       |                                 | 31 | Male   | 05   | Born at FPMZ-BH/<br>MG, Brazil                     | 2014 |
| <i>Leontopithecus<br/>chrysopygus</i> | Black Lion<br>Tamarin           | 32 | Male   | > 03 | Primate Center at<br>Rio de Janeiro/ RJ,<br>Brazil | 2016 |
|                                       |                                 | 33 | Female | > 03 | São Paulo Zoo/ SP,<br>Brazil                       | 2016 |
| <i>Saguinus<br/>imperator</i>         | Emperor<br>Tamarin              | 34 | Male   | 09   | Born at FPMZ-BH/<br>MG, Brazil                     | 2010 |
|                                       |                                 | 35 | Male   | > 09 | CETAS of Rio Branco/<br>AC, Brazil                 | 2010 |
|                                       |                                 | 36 | Female | 08   | Born at FPMZ-BH/<br>MG, Brazil                     | 2011 |
|                                       |                                 | 37 | Male   | > 18 | CETAS of Porto Velho/<br>RO, Brazil                | 2001 |
| <i>Sapajus apella</i>                 | Margarita<br>Island<br>Capuchin | 38 | Male   | > 05 | São Paulo Zoo/ SP,<br>Brazil                       | 2014 |
|                                       |                                 | 39 | Female | 12   | Born at FPMZ-BH/<br>MG, Brazil                     | 2007 |
|                                       |                                 | 40 | Female | > 11 | CETAS of Belo<br>Horizonte/ MG, Brazil             | 2008 |
|                                       |                                 | 41 | Male   | 10   | Born at FPMZ-BH/<br>MG, Brazil                     | 2009 |
|                                       |                                 | 42 | Female | > 13 | Primate Center of<br>Rio de Janeiro/RJ,<br>Brazil  | 2006 |

---

---

|                                  |                                |    |        |      |                                           |      |
|----------------------------------|--------------------------------|----|--------|------|-------------------------------------------|------|
|                                  |                                | 43 | Male   | 08   | Born at FPMZ-BH/<br>MG, Brazil            | 2011 |
| <i>Callicebus<br/>nigrifrons</i> | Black-fronted<br>Titi Monkey   | 44 | Female | > 02 | Wildlife at Divinópolis/<br>MG, Brazil    | 2017 |
| <i>Pithecia irrorata</i>         | Saki                           | 45 | Female | 09   | Born at FPMZ-BH/<br>MG, Brazil            | 2010 |
|                                  |                                | 46 | Female | 12   | Born at FPMZ-BH/<br>MG, Brazil            | 2007 |
|                                  |                                | 47 | Female | 11   | Born at FPMZ-BH/<br>MG, Brazil            | 2008 |
| <i>Miopithecus<br/>ogouensis</i> | Northern<br>Talapoin<br>Monkey | 48 | Male   | > 29 | ZooPark Brasil Nova<br>Iguaçu/ RJ, Brazil | 1990 |
|                                  |                                | 49 | Male   | > 27 | ZooPark Brasil Nova<br>Iguaçu/ RJ, Brazil | 1992 |
| <i>Pan troglodytes</i>           | Chimpanzee                     | 50 | Male   | > 19 | Barcelona Zoo, Spain                      | 2000 |
|                                  |                                | 51 | Male   | 18   | Born at FPMZ-BH/<br>MG, Brazil            | 2001 |
|                                  |                                | 52 | Female | 39   | Born at FPMZ-BH/<br>MG, Brazil            | 1980 |

---
