# Supplementary material for: Competence of non-human primates to transmit Leishmania infantum to the invertebrate vector Lutzomyia longipalpis
Source: PubMed Central journal article supplement (PMC6488095; doi:10.1371/journal.pntd.0007313), 2019-04-17
Supplement: pntd.0007313.s002.pdf [file pntd.0007313.s002.pdf]

**S2 Table.** Anesthetic protocols employed for each non-human primate species included in the study.

| <b>Neotropical Primates</b> |                                   |          |           |                                                                                                                                                     |  |
|-----------------------------|-----------------------------------|----------|-----------|-----------------------------------------------------------------------------------------------------------------------------------------------------|--|
| <b>Family</b>               | <b>Scientific Name</b>            | <b>N</b> | <b>ID</b> | <b>Anesthetic protocol</b>                                                                                                                          |  |
| Atelidae                    | <i>Alouatta caraya</i>            | 04       | 01 – 04   | Tiletamine (125mg) + Zolazepam (125mg) 5mg/kg, intramuscular                                                                                        |  |
|                             | <i>Alouatta guariba</i>           | 02       | 05 – 06   | Midazolam 0.6mg/kg and Ketamine 4-8mg/kg, both intramuscular, and maintenance with isoflurane                                                       |  |
|                             | <i>Lagothrix cana</i>             | 07       | 07 – 13   | Ketamine 5mg/kg, intramuscular, and maintenance with isoflurane                                                                                     |  |
| Aotidae                     | <i>Aotus nigriceps</i>            | 02       | 14 – 15   | Midazolam 0.6mg/kg and Ketamine 4mg/kg, both intramuscular, and maintenance with isoflurane                                                         |  |
| Callitrichidae              | <i>Leontopithecus chrysomelas</i> | 01       | 16        | Tiletamine (250mg) + Zolazepam (250mg) 4.5mg/kg, intramuscular                                                                                      |  |
|                             | <i>Leontopithecus rosalia</i>     | 15       | 17 – 31   | 17-20: Ketamine 8-10mg/kg, intramuscular, and maintenance with isoflurane.<br>21-31: Tiletamine (125mg) + Zolazepam (125mg) 0.1mg/kg, intramuscular |  |
|                             | <i>Leontopithecus chrysopygus</i> | 02       | 32 – 33   | Midazolam 0.5mg/kg and Ketamine 8mg/kg, both intramuscular                                                                                          |  |

|                           |                              |          |           |                                                                                                                                                                                                           |
|---------------------------|------------------------------|----------|-----------|-----------------------------------------------------------------------------------------------------------------------------------------------------------------------------------------------------------|
|                           | <i>Saguinus imperator</i>    | 04       | 34 – 37   | 34: Midazolam 0.6mg/kg and Ketamine 4-8mg/kg, both intramuscular, and maintenance with isoflurane<br>35-37: Tiletamine (125mg) + Zolazepam (125mg) 0.1mg/kg, intramuscular                                |
| Cebidae                   | <i>Sapajus apella</i>        | 06       | 38 – 43   | Tiletamine (125mg) + Zolazepam (125mg) 6mg/kg and xylazine 0.5mg/kg, both intramuscular                                                                                                                   |
| Pitheciidae               | <i>Callicebus nigrifrons</i> | 01       | 44        | Tiletamine (250mg) + Zolazepam (250mg) 4.5mg/kg, intramuscular                                                                                                                                            |
|                           | <i>Pithecia irrorata</i>     | 03       | 45 – 47   | Midazolam 0.5mg/kg and Ketamine 8mg/kg, both intramuscular                                                                                                                                                |
| <b>Old World Primates</b> |                              |          |           |                                                                                                                                                                                                           |
| <b>Family</b>             | <b>Scientific Name</b>       | <b>N</b> | <b>ID</b> | <b>Anesthetic protocol</b>                                                                                                                                                                                |
| Cercopithecidae           | <i>Miopithecus talapoin</i>  | 02       | 48 – 49   | Tiletamine (250mg) + Zolazepam (250mg) 4.5mg/kg, intramuscular                                                                                                                                            |
| Hominidae                 | <i>Pan troglodytes</i>       | 03       | 50 – 52   | 50: Tiletamine (250mg) + Zolazepam (250mg) 13.5mg/kg, intramuscular<br>51-52: Tiletamine (250mg) + Zolazepam (250mg) 13.5mg/kg, intramuscular, and maintenance with propofol, intravenous, and isoflurane |

Legend: N: number of the animals from each species. ID: individual identification of each animal.
