# Supplementary material for: Competence of non-human primates to transmit Leishmania infantum to the invertebrate vector Lutzomyia longipalpis
Source: PubMed Central journal article supplement (PMC6488095; doi:10.1371/journal.pntd.0007313), 2019-04-17
Supplement: pntd.0007313.s003.pdf [file pntd.0007313.s003.pdf]

**S3 Table.** Phlebotomine specimens captured within the Zoological Garden in Belo Horizonte (Brazil) from February 2014 to February 2015.

| Month<br>Species                | February |    | March |    | April |    | May |    | June |    | July |    | August |   | September |    | October |    | November |    | December |    | January |   | February |   | Total |     | Total |   |
|---------------------------------|----------|----|-------|----|-------|----|-----|----|------|----|------|----|--------|---|-----------|----|---------|----|----------|----|----------|----|---------|---|----------|---|-------|-----|-------|---|
|                                 | ♂        | ♀  | ♂     | ♀  | ♂     | ♀  | ♂   | ♀  | ♂    | ♀  | ♂    | ♀  | ♂      | ♀ | ♂         | ♀  | ♂       | ♀  | ♂        | ♀  | ♂        | ♀  | ♂       | ♀ | ♂        | ♀ | ♂     | ♀   | ♂ e ♀ |   |
| <i>Psathyromyia aragoai</i>     | 1        | -  | -     | -  | -     | -  | -   | -  | -    | -  | -    | -  | -      | - | -         | -  | -       | -  | -        | -  | -        | -  | -       | - | -        | - | -     | 1   | -     | 1 |
| <i>Evandromyia bacula</i>       | -        | -  | -     | -  | -     | -  | -   | -  | -    | -  | -    | -  | -      | - | -         | -  | -       | -  | -        | -  | 1        | -  | -       | - | -        | - | -     | 1   | 1     |   |
| <i>Evandromyia cortelezii</i>   | 3        | 7  | 8     | 6  | 8     | 7  | 7   | 8  | 12   | 6  | 6    | 3  | 3      | 6 | 5         | 7  | 1       | 3  | 13       | 18 | 6        | 11 | 2       | 5 | -        | - | 74    | 87  | 161   |   |
| <i>Lutzomyia ischnacantha</i>   | -        | -  | -     | -  | -     | -  | -   | -  | -    | -  | -    | -  | -      | - | -         | -  | -       | -  | -        | -  | -        | -  | 1       | - | -        | - | 1     | 1   |       |   |
| <i>Lutzomyia lenti</i>          | 10       | 10 | 4     | 1  | 11    | 7  | 9   | 9  | 6    | 6  | 3    | 2  | 6      | 2 | 6         | 5  | 9       | 5  | 5        | 7  | 16       | 8  | 5       | 1 | 2        | 1 | 92    | 64  | 156   |   |
| <i>Lutzomyia longipalpis</i>    | 6        | 2  | 2     | 1  | 11    | 7  | 7   | 2  | 9    | 5  | 3    | 3  | -      | - | 5         | 3  | 2       | -  | 2        | -  | 1        | -  | -       | - | -        | - | 48    | 23  | 71    |   |
| <i>Pintomyia monticola</i>      | 15       | 16 | 3     | 6  | 3     | 5  | 1   | 5  | -    | -  | -    | -  | 2      | - | -         | -  | -       | 1  | 1        | 1  | 2        | 1  | -       | - | -        | - | 27    | 35  | 62    |   |
| <i>Pintomyia pessoai</i>        | 59       | 34 | 59    | 22 | 152   | 91 | 49  | 55 | 33   | 15 | 7    | 12 | 5      | 7 | 17        | 97 | 4       | 10 | 8        | 3  | 73       | 23 | 9       | 6 | 10       | 4 | 485   | 379 | 864   |   |
| <i>Micropygomyia quinquefer</i> | -        | -  | -     | 1  | -     | -  | -   | -  | -    | -  | -    | -  | -      | - | -         | -  | -       | -  | -        | -  | -        | -  | -       | - | -        | - | -     | 1   | 1     |   |
| <i>Sciopemyia sordellii</i>     | -        | 2  | -     | 1  | -     | 1  | -   | -  | -    | -  | -    | -  | -      | - | -         | -  | -       | -  | -        | -  | -        | -  | -       | - | -        | - | -     | 4   | 4     |   |
| <i>Nyssomyia whitmani</i>       | 1        | -  | -     | -  | -     | -  | -   | 3  | -    | 2  | 2    | 2  | -      | - | 1         | 1  | -       | -  | -        | -  | -        | -  | -       | - | -        | - | 4     | 8   | 12    |   |
| * Not identified                | 4        | -  | 1     | -  | 8     | 10 | 1   | 4  | -    | -  | -    | -  | 2      | - | 3         | 9  | -       | 3  | 2        | -  | 2        | 6  | -       | 2 | -        | 1 | 23    | 34  | 58    |   |
| Total                           | 170      |    | 115   |    | 321   |    | 160 |    | 94   |    | 43   |    | 33     |   | 159       |    | 38      |    | 60       |    | 150      |    | 31      |   | 18       |   | 1392  |     | 1392  |   |

\* Not identifiable due to the poor quality of the specimens.
